# Supplementary material for: Specifications of the ACMG/AMP Variant Classification Guidelines for Germline DICER1 Variant Curation
Source: Hindawi journal article supplement (doi:10.1155/2023/9537832), 2023-03-29

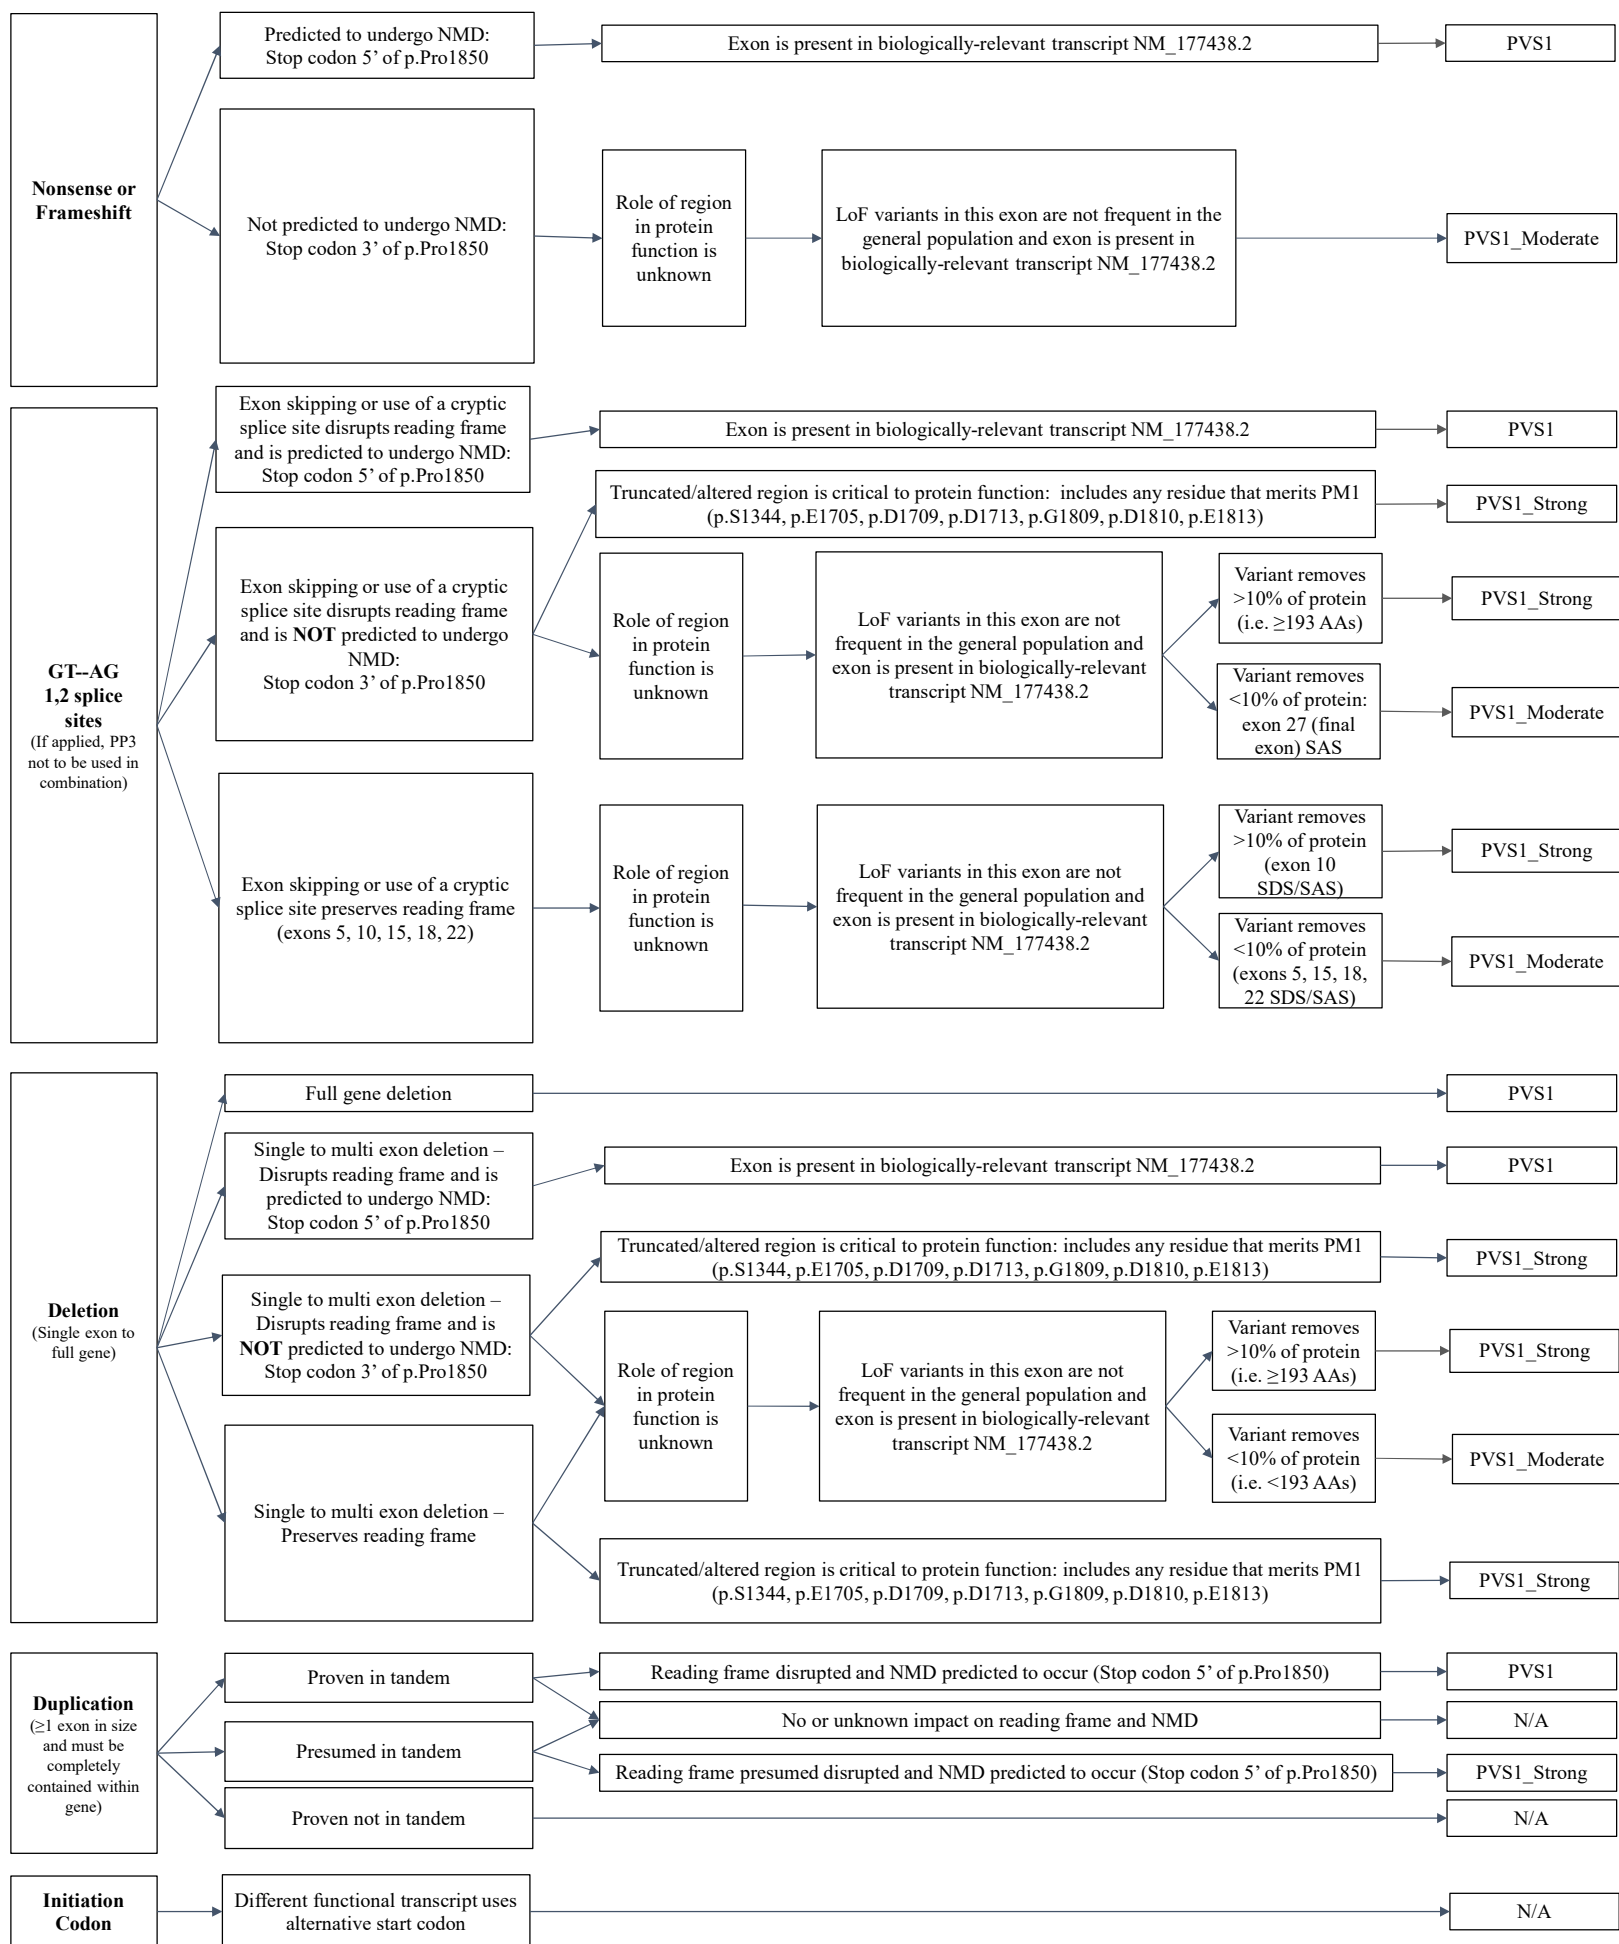

Supplement: f2 [file 9537832.f2.pdf]
