# Supplementary material for: Specifications of the ACMG/AMP Variant Classification Guidelines for Germline DICER1 Variant Curation
Source: PubMed Central journal article supplement (PMC10713350; doi:10.1155/2023/9537832), 2023-03-29

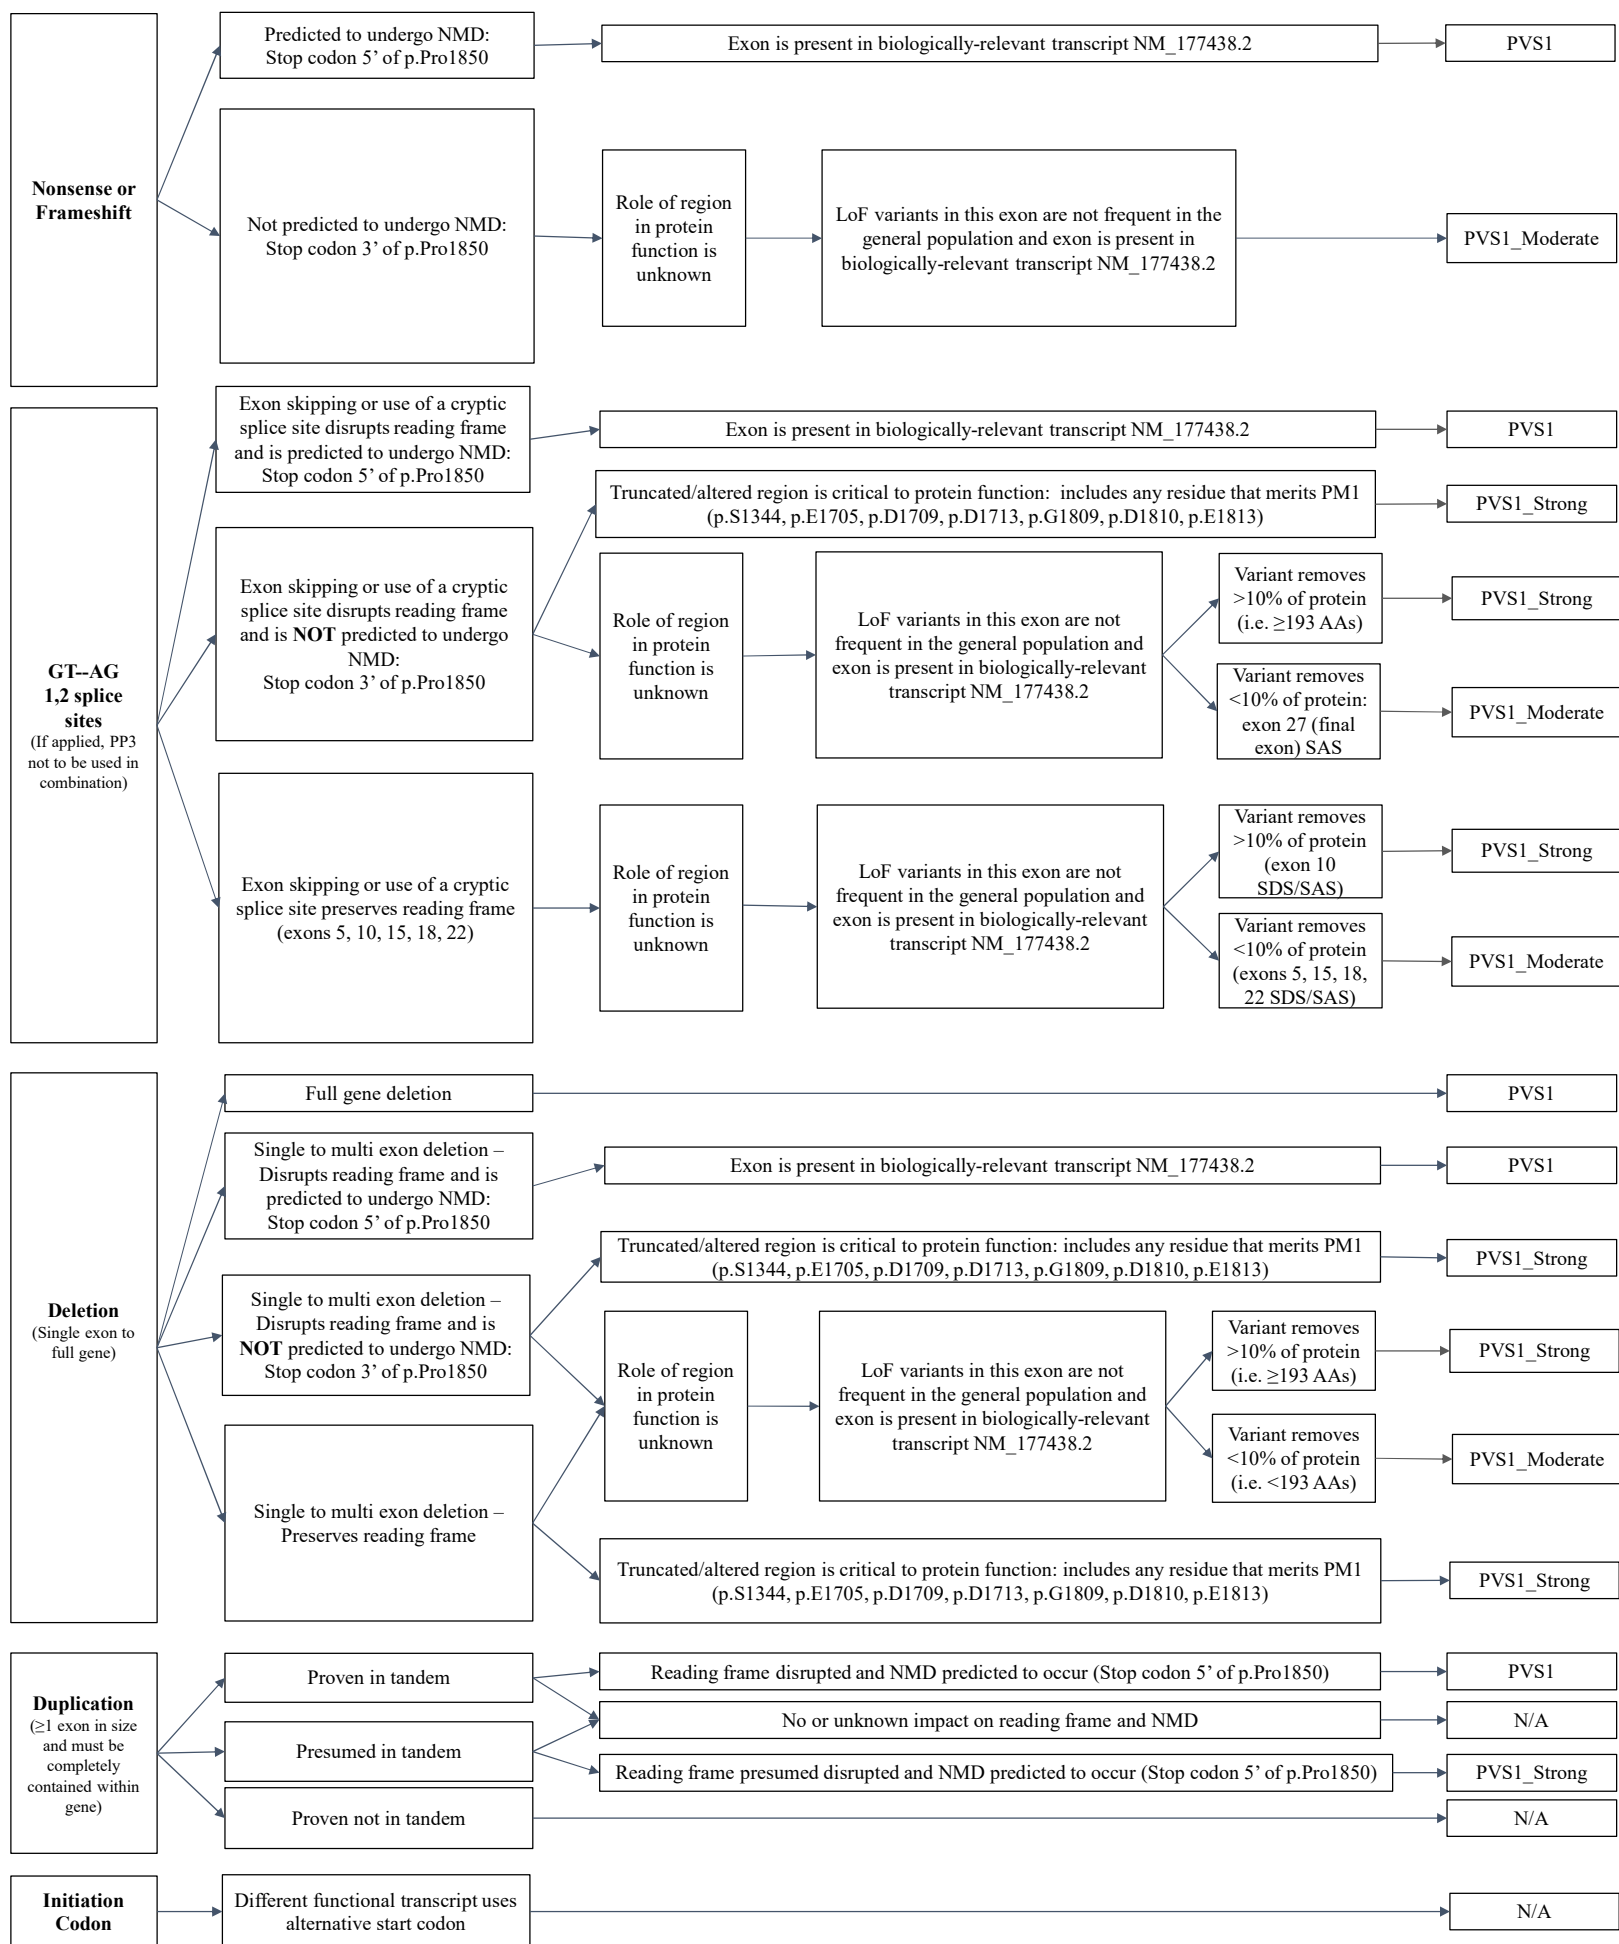

Supplement: NIHMS1948399-supplement-Supplementary_Figure_1.pdf [file NIHMS1948399-supplement-Supplementary_Figure_1.pdf]
